# Supplementary material for: Phylogeographic analysis of avian influenza viruses isolated from Charadriiformes in Belgium confirms intercontinental reassortment in gulls
Source: Springer Nature journal article supplement (doi:10.1007/s00705-012-1323-x), 2012-05-12
Supplement: MOESM16 [file 705_2012_1323_MOESM16_ESM.docx]

**American avian**

A/black-headed gull/Sweden/1/2005 (H13N8)

**A/Larus argentatus/Belgium/14469-20/2008 (H13N8)**

A/black-headed gull/Norway/10 1459/2006 (H13N8)

A/herring gull/Mongolia/454/2008 (H13N8)

A/black-headed gull/Netherlands/1/00 (H13N8)

A/mallard/Sweden/7/2003 (H10N8)

A/duck/Beijing/59/05 (H3N8)

A/duck/Siberia/100/2001 (H3N8)

A/duck/Korea/U2-5/2007 (H3N8)

A/duck/Burjatia/652/1988 (H3N8)

A/duck/Hubei/126/1985 (H7N8)

A/mallard/Czech Republic/13577-24K/2010 (H3N8)

A/slaty-backed gull/Japan/6KS0191/2006 (H4N8)

A/mallard/PT/29497-11/2006 (H3N8)

A/mute swan/Germany/R2927/2007 (H6N8)

A/Teal/Norway/10 1745/2007 (H4N8)

A/mallard/Germany/R529/2008 (H3N8)

A/common eider/Netherlands/1/2006 (H3N8)

A/mallard/Sweden/50/2002 (H3N8)

A/mallard/Netherlands/33/2006 (H7N8)

A/turnstone/Netherlands/1/2007 (H3N8)

A/Egyptian goose/South Africa/AI1448/2007 (H1N8)

A/goose/Zambia/06/2008 (H3N8)

A/teal/Chany/444/2009 (H8N8)

A/common teal/Netherlands/2/2005 (H6N8)

A/black-headed gull/Netherlands/1/2005 (H6N8)

A/duck/Spain/539/2006 (H6N8)

A/Anas platyrhynchos/Belgium/12827/2007 (H3N8)

A/mallard/Hungary/19616/2007 (H3N8)

A/Anas plathyrhynchos/Spain/0454/2006 (H3N8)

A/gadwall/Altai/1328/2007 (H3N8)

A/duck/Eastern China/163/2002 (H6N8)

A/duck/Norway/1/03 (H3N8)

A/mallard/Netherlands/17/2007 (H11N8)

A/Greater White-Fronted Goose/Germany-NW/R02/2009 (H6N8)

A/Teal/Norway/10 644/2010 (N8)

**A/Arenaria interpres/Belgium/17044-27/2008 (H3N8)**

88

100

100

100

84

76

100

97

92

81

98

85

96

100

100

58

100

0,02

N8

**Eurasian avian**

**Eurasian Charadriiformes subclade**
